# Supplementary material for: Scoping review using PRISMA-SCR on m-health interventions on self-care management of type 2 diabetes at home
Source: Research Square preprint supplement (doi:10.21203/rs.3.rs-1680004/v1), 2022-06-03
Supplement: Supplementary file 1 [file 56418b67deb7c4a89ecc9a7a.docx]

|  | **CATEGORY** | **CRITERIA** |
| --- | --- | --- |
| 1. | **Populations** | **Include**  The entire included population are adults (18+ years old) diagnosed with type 2 diabetes.  **Exclude**  Children, adolescents, pregnant women, those with pre-diabetes or risk factors for diabetes, or gestational diabetes |
| 2. | **Interventions** | **Include**  mobile device (i.e., phone, tablet, or watch) for diabetes self-management. Interventions must include at least one of the  **Exclude**  Medical devices that do not connect to a mobile phone or tablet (ie, blood glucose meter); artificial pancreas; texting interventions |
| 3. | **Comparators** | **Include**  Usual care or other mobile or nonmobile program for diabetes self-management; no comparator but part of a registry study |
| 4. | **Outcomes** | **Include**  All patient outcomes  **Exclude**  Health provider outcomes, outcomes on the health care system, performance on technology outcomes |
| 5. | **Timing/Setti**  **ng** | **Include**  Any setting; any study length; only studies published after 2010 |

| 2. | Filter in last 10 years | 5977 |
| --- | --- | --- |
| 3 | Filters RCT + Age 18 above | 85 |
| 4 | Filters Human+ English | 72 |
| 5 | Filter Gender Male/ female +Abstract | 58 |
| 6 | Shortlisted putting exclusion and inclusion | 40 |
| 7 | Final articles included | 40 |

| 8 | **Study design** | **Include**  Randomized controlled trials, nonrandomized controlled trials, or another observational study with a comparator.  Exclude  post studies without a comparator |
| --- | --- | --- |
| 9 | **Language** | **English** |
